# Supplementary material for: Individualized Remotely Supervised Motor Activity Programs Promote Rehabilitation Goal Achievement, Motor Functioning, and Physical Activity of People with Rett Syndrome—A Single-Cohort Study
Source: MDPI journal article supplement (doi:10.3390/ijerph20010659), 2022-12-30
Supplement: s1 [file s1]

**Table S2.** Pre-intervention, post-intervention (T3), and follow-up (T4) GAS levels and related T-scores for each goal and each participant. This supplementary material is meant to help clinicians working with individuals with RTT to find adequate therapeutic goals for their clients. The reference age, RTT severity level, and motor functioning level of each participant are available in Supplementary material 1.

| Pt. | Goal area        | Pre-intervention (T2) level                                                                  | Level reached at post-intervention (T3)                                                       | GAS score at T3 | T-score at T3 | Level reached at follow-up (T4)                                                                | GAS score at T4 | T-score at T4 |
|-----|------------------|----------------------------------------------------------------------------------------------|-----------------------------------------------------------------------------------------------|-----------------|---------------|------------------------------------------------------------------------------------------------|-----------------|---------------|
| 1   | Motor function   | Can walk for 8 steps independently                                                           | Can walk for 15 steps independently                                                           | 0               | 60.6          | Can walk for 25 steps independently                                                            | +1              | 58.5          |
|     | Motor function   | Can sit on an air cushion for 30"                                                            | Can sit on an air cushion for 2'                                                              | +1              |               | Can sit on an air cushion for 1'                                                               | 0               |               |
|     | Motor function   | Can stand independently for 15"                                                              | Can stand independently for 1'                                                                | +1              |               | Can stand independently for 1'                                                                 | +1              |               |
| 2   | Range of motion  | Hands 1st interphalangeal extension ROM (30° bilat)                                          | Improvement of 10°                                                                            | +1              | 60.0          | Improvement of 10°                                                                             | +1              | 67.5          |
|     | Range of motion  | Shoulder flexion ROM (115° Rt - 90° Lt)                                                      | Improvement of 5°                                                                             | 0               |               | Improvement of 5°                                                                              | 0               |               |
|     | Range of motion  | Shoulder abduction ROM (85° Rt - 40° Lt)                                                     | Improvement of 10°                                                                            | +1              |               | Improvement of 10°                                                                             | +1              |               |
|     | Motor function   | Can sit unsupported for 30"                                                                  | Can sit unsupported for 2'                                                                    | +1              |               | Can sit unsupported <5'                                                                        | +2              |               |
| 3   | Motor function   | Can walk in the pool for 30 min without a flotation device, and the water at the chest level | Can walk in the pool for 20 min without a flotation device, and the water at the pelvis level | +1              | 59.6          | Can walk in the pool for >30 min without a flotation device, and the water at the pelvis level | +2              | 62.8          |
|     | Physical fitness | Weight: 54 Kg                                                                                | No weight variation                                                                           | -1              |               | No weight variation                                                                            | -1              |               |
|     | Motor function   | Can sit for 5" without back support with strong support to the pelvis                        | Can sit for 5" without back support independently                                             | +2              |               | Can sit for 5" without back support independently                                              | +2              |               |
|     | Motor function   | Can sit without back support for 10"                                                         | Can sit without back support up to 2'                                                         | +1              |               | Can sit without back support for more than 2'                                                  | +2              |               |
| 4   | Motor function   | Can climb a stair with strong support given to both arms from the front                      | Can climb a stair with support given to one hand and the                                      | +1              | 61.1          | Can climb a stair with support given to one hand and the other hand maintained on the rail     | +1              | 67.4          |

|   |                  |                                                                                                                                                                |                                                                                                                                                               |    |      |                                                                                                                                                               |         |
|---|------------------|----------------------------------------------------------------------------------------------------------------------------------------------------------------|---------------------------------------------------------------------------------------------------------------------------------------------------------------|----|------|---------------------------------------------------------------------------------------------------------------------------------------------------------------|---------|
|   |                  |                                                                                                                                                                | other hand maintained on the rail                                                                                                                             |    |      |                                                                                                                                                               |         |
|   | Motor function   | Can descend a stair with strong support given to both arms from the front                                                                                      | Can descend a stair with strong support given to both arms from the front                                                                                     | -1 |      | Can descend a stair with support given to one wrist and the other hand maintained on the rail                                                                 | +1      |
|   | Motor function   | Amount of time she needs support to prevent falls while walking independently on uneven terrain in 10 min (field with high grass) (7 times) with a safety belt | Amount of time she needs support to prevent falls while walking independently on uneven terrain in 10 min (field with high grass) (1 time) with a safety belt | +1 |      | Amount of time she needs support to prevent falls while walking independently on uneven terrain in 10 min (field with high grass) (1 time) with a safety belt | +1      |
|   | Range of motion  | Left shoulder flexion ROM                                                                                                                                      | Improvement of 10°                                                                                                                                            | +1 |      | Improvement of 10°                                                                                                                                            | +1      |
|   | Range of motion  | Left shoulder abduction ROM                                                                                                                                    | Improvement of 10°                                                                                                                                            | +1 |      | Improvement of 10°                                                                                                                                            | +1      |
|   | Range of motion  | Right shoulder flexion ROM                                                                                                                                     | Improvement of 10°                                                                                                                                            | +1 |      | Improvement of 10°                                                                                                                                            | +1      |
|   | Range of motion  | Right shoulder abduction ROM                                                                                                                                   | Improvement of 10°                                                                                                                                            | +1 |      | Improvement of 10°                                                                                                                                            | +1      |
|   | Physical fitness | Weight: 64.3 Kg                                                                                                                                                | No weight variation                                                                                                                                           | -1 |      | No weight variation                                                                                                                                           | -1      |
|   | Motor function   | Can walk for 5 steps independently                                                                                                                             | Can walk for 5 steps independently                                                                                                                            | -1 |      | Can walk for 10 steps independently                                                                                                                           | 0       |
| 5 | Motor function   | Can walk 10 steps with support given to one hand                                                                                                               | Can walk 10 steps with a light touch (one finger) on her shoulder                                                                                             | +1 | 51.4 | Can walk 10 steps independently                                                                                                                               | +2 61.0 |
|   | Motor function   | Can stand for 1' independently                                                                                                                                 | Can stand for 5' independently                                                                                                                                | +1 |      | Can stand for >5' independently                                                                                                                               | +2      |
|   | Range of motion  | Fixed head flexion to the left for 24°                                                                                                                         | Improvement of 10°                                                                                                                                            | +1 |      | Improvement of 10°                                                                                                                                            | +1      |
|   | Motor function   | Can sit on the floor with crossed legs for 2'                                                                                                                  | Can sit on the floor with crossed legs for 10'                                                                                                                | +1 |      | Can sit on the floor with crossed legs for 10'                                                                                                                | +1      |
| 6 | Motor function   | Can stand for 10" independently, holding the rail by herself                                                                                                   | Can stand for 10" independently, holding the rail by herself                                                                                                  | -1 | 59.0 | Can stand for 10" independently, holding the rail by herself                                                                                                  | -1 60.5 |

|   |                 |                                                                                                                                                                |                                                                                                                     |    |                                                                                                   |    |
|---|-----------------|----------------------------------------------------------------------------------------------------------------------------------------------------------------|---------------------------------------------------------------------------------------------------------------------|----|---------------------------------------------------------------------------------------------------|----|
|   | Range of motion | Head left flexion limited to 15°                                                                                                                               | Improvement of 10°                                                                                                  | +1 | Improvement of 10°                                                                                | +1 |
|   | Range of motion | Head left rotation limited to midline                                                                                                                          | Full ROM                                                                                                            | +2 | Full ROM                                                                                          | +2 |
|   | Range of motion | Hip extension limited to -20°                                                                                                                                  | Improvement of 5°                                                                                                   | 0  | Hip extension limited for -20°                                                                    | -1 |
| 7 | Motor function  | Amount of time she needs support to prevent falls while walking independently on uneven terrain in 10 min (field with high grass) (5 times) with a safety belt | Never needs support to prevent falls with a safety belt                                                             | +2 | Never needs support to prevent falls with a safety belt                                           | +2 |
|   | Motor function  | Can walk 10 steps independently with a safety belt                                                                                                             | Can walk >50 steps independently with a safety belt                                                                 | +2 | Can walk >50 steps independently with a safety belt                                               | +2 |
|   | Motor function  | Can climb a stair with full support given to the trunk from behind with elastic bandages                                                                       | Can climb a stair with support given to one hand and the other hand maintained on the rail with elastic bandages    | +2 | Can climb a stair with support given to both wrists with elastic bandages                         | +1 |
|   | Motor function  | Can descend a stair with strong support given to the trunk from behind with elastic bandages                                                                   | Can descend a stair with support given to one wrist and the other hand maintained on the rail with elastic bandages | +2 | Can descend a stair with strong support given to both wrists from the front with elastic bandages | +1 |
| 8 | Motor function  | Amount of time she needs support to prevent falls while walking independently on uneven terrain in 10 min (field with high grass) (5 times)                    | Never needs support to prevent falls                                                                                | +2 | Never needs support to prevent falls                                                              | +2 |
|   | Motor function  | Can walk up a mild slope with support given to one hand                                                                                                        | Can walk up a mild slope with support given to one sleeve                                                           | 0  | Can walk up a mild slope with support given to one sleeve                                         | 0  |
|   | Motor function  | Cannot walk up a slope independently                                                                                                                           | Cannot walk up a slope independently                                                                                | -2 | Can walk 5 steps up a slope independently                                                         | -1 |

|    |                  |                                                                                                                                                                 |                                                                                                                                            |    |      |                                                                                                                                          |    |      |
|----|------------------|-----------------------------------------------------------------------------------------------------------------------------------------------------------------|--------------------------------------------------------------------------------------------------------------------------------------------|----|------|------------------------------------------------------------------------------------------------------------------------------------------|----|------|
|    | Motor function   | Can walk down a mild slope with support given to one hand                                                                                                       | Can walk down a mild slope independently with a safety belt                                                                                | +1 |      | Can walk down a mild slope independently with a safety belt                                                                              | +1 |      |
|    | Motor function   | Can walk 5 steps down a slope independently                                                                                                                     | Cannot walk down a slope independently                                                                                                     | -2 |      | Can walk up to 20 steps down a slope independently                                                                                       | +1 |      |
| 9  | Physical fitness | Pre-intervention bone density                                                                                                                                   | Pre-intervention bone density                                                                                                              | -1 |      | Pre-intervention bone density                                                                                                            | -1 |      |
|    | Motor function   | Can climb a stair with strong support given to both arms from the front and elastic bandages for leg bending                                                    | Can climb a stair with strong support given to both arms from the front and elastic bandages for leg bending                               | -1 |      | Can climb a stair with support given to both wrists and elastic bandages for leg bending                                                 | 0  |      |
|    | Motor function   | Can descend the stair with strong support given from the front with one hand under her armpit and one hand holding her arm and elastic bandages for leg bending | Can descend the stair with strong support given from the front to both arms and elastic bandages for leg bending                           | 0  |      | Can descend the stair with strong support given from the front to both arms and elastic bandages for leg bending                         | 0  |      |
|    | Motor function   | Can stand up with slight support given to wrists                                                                                                                | Can stand up with slight support given to one wrist                                                                                        | 0  | 48.8 | Can stand up with slight support given to one wrist                                                                                      | 0  | 52.4 |
|    | Motor function   | Can sit on a chair with intense sensory input given to the head and the pelvis (hips flexion) when the back of her knees touches the chair                      | Can sit on a chair with intense sensory input given to the head and the pelvis (hips flexion) when the back of her knees touches the chair | -1 |      | Can sit on a chair with light sensory input given to the head and the pelvis (hips flexion) when the back of her knees touches the chair | 0  |      |
|    | Range of motion  | Elbow extension: -60°                                                                                                                                           | Elbow extension: -60°                                                                                                                      | -1 |      | Deterioration of at least 10°                                                                                                            | -2 |      |
|    | Motor function   | Can stand for 1 to 2 min by herself, leaning with her hand on a piece of furniture                                                                              | Can stand for >5 min by herself, leaning with her hand on a piece of furniture                                                             | +2 |      | Can stand for >5 min by herself, leaning with her hand on a piece of furniture                                                           | +2 |      |
|    | Motor function   | Toe walking for <70% of the time when without splints                                                                                                           | Toe walking for <20% of the time when without splints                                                                                      | +1 |      | Toe walking for <50% of the time when without splints                                                                                    | 0  |      |
| 10 | Hand functioning | Participate in table setting, putting one object on the table                                                                                                   | Participate in table setting, putting more than four objects on the table                                                                  | +2 | 67.0 | Participate in table setting, putting more than four objects on the table                                                                | +2 | 67.0 |

|    |                 |                                                                                                                                            |                                                                                                                                            |    |      |                                                                                                                                            |    |      |
|----|-----------------|--------------------------------------------------------------------------------------------------------------------------------------------|--------------------------------------------------------------------------------------------------------------------------------------------|----|------|--------------------------------------------------------------------------------------------------------------------------------------------|----|------|
|    | Motor function  | Can run independently for 10-20 steps                                                                                                      | Can run independently for 20-30 steps                                                                                                      | 0  |      | Can run independently for 30-40 steps                                                                                                      | +1 |      |
|    | Motor function  | Toe walking for <70% of the time when without splints                                                                                      | Toe walking for <50% of the time when without splints                                                                                      | 0  |      | Toe walking for <50% of the time when without splints                                                                                      | 0  |      |
|    | Range of motion | Right ankle dorsal flexion at +3°                                                                                                          | Improvement of 10°                                                                                                                         | +1 |      | Improvement of 5°                                                                                                                          | 0  |      |
|    | Range of motion | Left ankle dorsiflexion at +2°                                                                                                             | Improvement of 5°                                                                                                                          | 0  |      | Left ankle dorsiflexion at +2°                                                                                                             | -1 |      |
| 11 | Motor function  | Can climb a stair independently with the hand on the rail, under strict supervision, with both feet on each step                           | Can climb a stair independently with the hand on the rail without supervision, with both feet on each step                                 | 0  | 57.0 | Can climb a stair independently without supervision, with both feet on each step                                                           | +1 | 55.6 |
|    | Motor function  | Can descend a stair with support given to one hand and the other hand maintained on the rail                                               | Can descend a stair independently, holding the rail with close supervision                                                                 | +1 |      | Can descend a stair independently, holding the rail with close supervision                                                                 | +1 |      |
|    | Motor function  | Can sit on a chair with intense sensory input given to the head and the pelvis (hips flexion) when the back of her knees touches the chair | Can sit on a chair with intense sensory input given to the head and the pelvis (hips flexion) when the back of her knees touches the chair | -1 |      | Can sit on a chair with intense sensory input given to the head and the pelvis (hips flexion) when the back of her knees touches the chair | -1 |      |
|    | Motor function  | Can stand up with slight support given to wrists                                                                                           | Can stand up with slight support given to one wrist                                                                                        | 0  |      | Can stand up with slight support given to one wrist                                                                                        | 0  |      |
| 12 | Range of motion | No worsening in both shoulders flexion                                                                                                     | Improvement of 10° (both shoulders)                                                                                                        | +1 | 43.2 | ROM shoulder flexion (worsening in the left shoulder in follow-up evaluation)                                                              | -2 | 41.5 |
|    | Range of motion | No worsening in both shoulders abduction                                                                                                   | No worsening in both shoulders abduction                                                                                                   | -1 |      | ROM shoulder abduction (worsening in the left shoulder in follow-up evaluation)                                                            | -2 |      |
|    | Range of motion | No worsening in both elbow extension                                                                                                       | Improvement of 10° (both elbows)                                                                                                           | +1 |      | Improvement of 10° (both elbows)                                                                                                           | +1 |      |
|    | Motor function  | Can sit independently on a stool in a vestibular plate for 1'                                                                              | Can sit independently on a stool in a vestibular plate for 1'                                                                              | -1 |      | Can sit independently on a stool in a vestibular plate for 2'                                                                              | 0  |      |

|    |                  |                                                                                                                                            |                                                                                                                                          |    |      |                                                                                                                                          |    |      |
|----|------------------|--------------------------------------------------------------------------------------------------------------------------------------------|------------------------------------------------------------------------------------------------------------------------------------------|----|------|------------------------------------------------------------------------------------------------------------------------------------------|----|------|
| 13 | Motor function   | Can climb the stair with support to one hand and the other hand on the rail in 1'                                                          | Can climb the stair held by one sleeve in 30"                                                                                            | +1 | 56.7 | Can climb the stair with support to one hand and the other hand on the rail in 30"                                                       | 0  | 43.3 |
|    | Motor function   | Can descend the stair with support to one forearm and the other hand passively moved on the rail in 2'                                     | Can descend the stair with support to one forearm and the other hand passively moved on the rail in 1'                                   | 0  |      | Can descend the stair with support to one forearm and the other hand passively moved on the rail in 2'                                   | -1 |      |
| 14 | Hand functioning | Can wear the T-shirt with the help of an adult                                                                                             | Can wear a T-shirt (head and one sleeve)                                                                                                 | +1 | 75.0 | Can wear tha-shirt (head and one sleeve)                                                                                                 | +1 | 75.0 |
|    | Hand functioning | Can take the T-shirt off with the help of an adult                                                                                         | Can take the T-shirt off independently                                                                                                   | +2 |      | Can take the T-shirt off independently                                                                                                   | +2 |      |
|    | Hand functioning | Participate in table setting, putting one object on the table                                                                              | Participate in table setting, putting more than four objects on the table                                                                | +2 |      | Participate in table setting, putting more than four objects on the table                                                                | +2 |      |
| 15 | Motor function   | Can stand up with slight support given to wrists                                                                                           | Can stand up with slight support given to wrists                                                                                         | -1 | 30.4 | Can stand up with slight support given to one wrist and quick sensory input to the knee                                                  | 0  | 52.8 |
|    | Motor function   | Can sit on a chair with intense sensory input given to the head and the pelvis (hips flexion) when the back of her knees touches the chair | Can sit on a chair with light sensory input given to the head and the pelvis (hips flexion) when the back of her knees touches the chair | 0  |      | Can sit on a chair with light sensory input given to the head and the pelvis (hips flexion) when the back of her knees touches the chair | 0  |      |
|    | Motor function   | Can stand independently for 2'                                                                                                             | Can stand independently for less than 1'                                                                                                 | -2 |      | Can stand independently for 3'                                                                                                           | 0  |      |
|    | Motor function   | Can walk for 20 steps independently                                                                                                        | Can walk for 10 steps independently                                                                                                      | -2 |      | Can walk for 30 steps independently                                                                                                      | 0  |      |
|    | Motor function   | Can sit in a vestibular plate in asymmetrical sitting for 1' with 2 falls                                                                  | Can sit in a vestibular plate in asymmetrical sitting for 1' with 1 fall                                                                 | 0  |      | Can sit in a vestibular plate in asymmetrical sitting for 1' with 0 fall                                                                 | +1 |      |
| 16 | Motor function   | Can climb a stair with strong support given to both wrists                                                                                 | Can climb a stair with support given to one sleeve and the                                                                               | +1 | 62.4 | Can climb a stair with support given to one sleeve and the                                                                               | +1 | 62.4 |

|    |                  |                                                                                                                                            |                                                                                                                                             |    |      |                                                                                                                         |    |      |
|----|------------------|--------------------------------------------------------------------------------------------------------------------------------------------|---------------------------------------------------------------------------------------------------------------------------------------------|----|------|-------------------------------------------------------------------------------------------------------------------------|----|------|
|    |                  |                                                                                                                                            | other hand maintained on the rail                                                                                                           |    |      | other hand maintained on the rail                                                                                       |    |      |
|    | Motor function   | Can descend a stair with strong support given to both arms from the front                                                                  | Can descend a stair with support given to one wrist and the other hand maintained on the rail                                               | +1 |      | Can descend a stair with support given to one wrist and the other hand maintained on the rail                           | +1 |      |
|    | Motor function   | Can walk for 20 minutes before refusing to continue                                                                                        | Can walk for 45 minutes before refusing to continue                                                                                         | +1 |      | Can walk for 45 minutes before refusing to continue                                                                     | +1 |      |
|    | Motor function   | Can stand up from a chair with light support given to both wrists                                                                          | Can stand up from a chair with light support given to one wrist                                                                             | 0  |      | Can stand up from a chair with light support given to one wrist                                                         | 0  |      |
| 17 | Motor function   | Can sit on a chair with intense sensory input given to the head and the pelvis (hips flexion) when the back of her knees touches the chair | Can sit on a chair with light sensory input given to the pelvis (hips flexion) when the back of her knees touches the chair                 | +1 | 56.7 | Can sit on a chair independently when the back of her knees touches the chair                                           | +2 | 63.4 |
|    | Range of motion  | No knee flexion worsening                                                                                                                  | No knee flexion worsening                                                                                                                   | -1 |      | No knee flexion worsening                                                                                               | -1 |      |
|    | Motor function   | Can sit on the wedge without support to the back and the feet for <4 minutes                                                               | Can sit on the wedge without support to the back and the feet for >20 minutes (no time limit)                                               | +2 |      | Can sit on the wedge without support to the back and the feet for >20 minutes (no time limit)                           | +2 |      |
| 18 | Motor function   | Can walk for 2 minutes on the treadmill at 1km\h                                                                                           | Can walk for 10 minutes on the treadmill at 1km\h                                                                                           | +1 | 64.9 | Can walk for 10 minutes on the treadmill at 1km\h                                                                       | +1 | 68.2 |
|    | Motor function   | Can walk for 2 minutes on the treadmill at 1km\h, pulse at 120 bpm                                                                         | Can walk for 2 minutes on the treadmill at 1km\h, pulse at 100 bpm                                                                          | +1 |      | Can walk for 2 minutes on the treadmill at 1km\h, pulse at 85 bpm                                                       | +2 |      |
|    | Motor function   | Can walk for 2 minutes on the treadmill at 1km\h                                                                                           | Can walk for 2 minutes on the treadmill at 1,5 km\h                                                                                         | 0  |      | Can walk for 2 minutes on the treadmill at 1,5 km\h                                                                     | 0  |      |
| 19 | Hand functioning | Can participate in the movements to wear the t-shirt inserting both arms in the sleeves                                                    | Can participate in the movements to wear the t-shirt placed on her head, inserting the head independently and both arms in the sleeves with | 0  | 58.7 | Can participate in the movements to wear the t-shirt placed on her head, inserting the head and both arms independently | +1 | 61.3 |

|                                                      |                                                                                                     |                                                                                                        |    |      |                                                                                                        |    |
|------------------------------------------------------|-----------------------------------------------------------------------------------------------------|--------------------------------------------------------------------------------------------------------|----|------|--------------------------------------------------------------------------------------------------------|----|
| little help (mother enlarged the t-shirt lower flap) |                                                                                                     |                                                                                                        |    |      |                                                                                                        |    |
| Hand functioning                                     | Can participate in the movements to take off the t-shirt raising both arms                          | Can take off the t-shirt after the caregiver has taken off both arms                                   | 0  |      | Can take off the t-shirt after the caregiver has taken off both arms                                   | 0  |
| Hand functioning                                     | Can participate in the movements to take the pants up with complete physical guidance               | Can take the pants up independently to the pelvis level                                                | +1 |      | Can take the pants up independently                                                                    | +2 |
| Hand functioning                                     | Can participate in the movements to take the pants down with complete physical guidance             | Can take the pants down independently                                                                  | +2 |      | Can take the pants down independently                                                                  | +2 |
| Hand functioning                                     | Can participate in the movements to take up the zip of the jacket with complete physical guidance   | Can take the zip up when the jacket bottom flap is held by the caregiver and with easier adapted zip   | 0  |      | Can take the zip up when the jacket bottom flap is held by the caregiver and with easier adapted zip   | 0  |
| Hand functioning                                     | Can participate in the movements to take down the zip of the jacket with complete physical guidance | Can take the zip down when the jacket bottom flap is held by the caregiver and with easier adapted zip | 0  |      | Can take the zip down when the jacket bottom flap is held by the caregiver and with easier adapted zip | 0  |
| Physical fitness                                     | Can imitate at least one targets movement                                                           | Can imitate at least three targets movements                                                           | +1 |      | Can imitate at least two targets movements                                                             | 0  |
| Physical fitness                                     | Pee in the toilette at least 25% of the daily toilette times                                        | Pee in the toilette at least 25% of the daily toilette times                                           | -1 |      | Pee in the toilette at least 25% of the daily toilette times                                           | -1 |
| 20                                                   | Motor function                                                                                      | Can walk >11 steps supported by two hands                                                              | +1 | 53.8 | Can walk >11 steps independently with close supervision                                                | +1 |
|                                                      | Motor function                                                                                      | Can walk at least 10 steps independently with close supervision                                        | +2 |      | Can walk at least 50 steps independently with close supervision                                        | +2 |



|    |                  |                                                                                                           |                                                                                                               |    |      |                                                                                                               |    |      |
|----|------------------|-----------------------------------------------------------------------------------------------------------|---------------------------------------------------------------------------------------------------------------|----|------|---------------------------------------------------------------------------------------------------------------|----|------|
|    | Motor function   | Can stand for 1 minute supported by both arms                                                             | Can stand for 1 minute supported by one arm                                                                   | 0  |      | Can stand for 1 minute supported by both arms                                                                 | -1 |      |
|    | Motor function   | Can stand independently for 20 sec                                                                        | Can't stand independently even for a few seconds                                                              | -2 |      | Can stand independently for 20 sec                                                                            | -1 |      |
|    | Hand functioning | Can eat a piece of food with her hand with complete physical guidance (hand on hand)                      | Can eat a piece of food with her hand with partial physical guidance (hand on the wrist)                      | 0  |      | Can eat a piece of food with her hand with partial physical guidance (hand on the wrist)                      | 0  |      |
|    | Hand functioning | Can eat a piece of food with her hand with complete physical guidance (hand on hand)                      | Can eat a piece of food with her hand with partial physical guidance (hand on the wrist)                      | 0  |      | Can eat a piece of food with her hand with partial physical guidance (hand on the arm)                        | +1 |      |
|    | Hand functioning | Able to maintain the bottle with both hands while drinking with complete physical guidance (hand-on-hand) | Able to maintain the bottle with both hands while drinking with partial physical guidance (hand on the wrist) | 0  |      | Able to maintain the bottle with both hands while drinking with partial physical guidance (hand on the wrist) | 0  |      |
|    | Motor function   | Can walk independently on the lawn for <1 minute without falling                                          | Can walk independently on the lawn for <5 minutes without falling                                             | +1 |      | Can walk independently on the lawn for <10 minutes without falling                                            | +2 |      |
| 21 | Motor function   | Can climb the stairs with strong support given to both arms and elastic bandages to both knees            | Can climb the stairs with strong support given to both arms                                                   | 0  | 54.2 | Can climb the stairs with strong support given to one arm                                                     | +1 | 62.7 |
|    | Motor function   | Can descend the stairs with strong support given to both arms and elastic bandages to both knees          | Can descend the stairs with strong support given to both arms                                                 | 0  |      | Can descend the stairs with strong support given to both arms                                                 | 0  |      |
|    | Motor function   | Can participate in the movement of standing up from the floor with strong support given to the trunk      | Can participate in the movement of standing up from the floor with strong support given to both wrists        | 0  |      | Can participate in the movement of standing up from the floor with strong support given to both wrists        | 0  |      |
| 22 | Motor function   | Can climb the stair supported by one person in front of her to both wrists                                | Can climb the stair supported by one person in front of her holding one wrist and the other hand on the rail  | 0  | 54.7 | Can climb the stair supported by one person in front of her holding one hand on the rail                      | +1 | 52.4 |

|    |                 |                                                                                                                                                     |                                                                                                                                                     |    |      |                                                                                                                                                     |    |      |
|----|-----------------|-----------------------------------------------------------------------------------------------------------------------------------------------------|-----------------------------------------------------------------------------------------------------------------------------------------------------|----|------|-----------------------------------------------------------------------------------------------------------------------------------------------------|----|------|
|    | Motor function  | Can descend the stair supported by one person in front of her to both wrists                                                                        | Can descending the stair supported by one person in front of her holding one hand on the rail                                                       | +1 |      | Can descending the stair supported by one person in front of her holding one hand on the rail                                                       | +1 |      |
|    | Motor function  | Can assist the movement of standing up from a high chair (half flexed hip, 45°) when pulled from one wrist and with the chair gently tilted forward | Can assist the movement of standing up from a high chair (half flexed hip, 45°) when pulled from one wrist and with the chair gently tilted forward | -1 |      | Can assist the movement of standing up from a high chair (half flexed hip, 45°) when pulled from one wrist and with the chair gently tilted forward | -1 |      |
|    | Motor function  | Can sit on a chair from standing with strong sensory input given to the pelvis                                                                      | Can sit on a chair independently with verbal command when the chair is behind her                                                                   | +1 |      | Can sit on a chair from standing with gentle sensory input given to the pelvis                                                                      | 0  |      |
|    | Range of motion | no deterioration                                                                                                                                    | Improvement of 10°                                                                                                                                  | +1 |      | Improvement of 10°                                                                                                                                  | +1 |      |
| 23 | Motor function  | Can sit asymmetrically on the arm of the couch for <1 minute                                                                                        | Can sit asymmetrically on the arm of the couch for at least 20 minutes                                                                              | +2 | 70.0 | Can sit asymmetrically on the arm of the couch for at least 20 minutes                                                                              | +2 | 57.5 |
|    | Motor function  | Can stand holding support in front of her with both hands for at least 2 minutes                                                                    | Can stand holding support in front of her with both hands for at least 5 minutes                                                                    | 0  |      | Can stand holding support in front of her with both hands for at least 2 minutes                                                                    | -1 |      |
|    | Motor function  | Can stand for 2 minutes supported by both arms from the front                                                                                       | Can stand for 2 minutes supported by both wrists from the front                                                                                     | +1 |      | Can stand for 2 minutes supported by both arms from the front                                                                                       | -1 |      |
|    | Motor function  | Can walk 10 steps with full support from behind and help to move the legs forward                                                                   | Can walk 10 steps with strong support given from the front to both arms                                                                             | +1 |      | Can walk 10 steps with full support from behind and help to move the legs forward                                                                   | -1 |      |
| 24 | Motor function  | Can sit on a chair from standing with light support given to head and pelvis and with feet maintained in position                                   | Can sit on a chair from standing with light support given to the pelvis and with feet maintained in position                                        | 0  | 47.5 | Can sit on a chair from standing with light support given to the pelvis and with feet maintained in position                                        | 0  | 51.2 |

|    |                |                                                                               |                                                                            |    |      |                                                                            |    |      |
|----|----------------|-------------------------------------------------------------------------------|----------------------------------------------------------------------------|----|------|----------------------------------------------------------------------------|----|------|
|    | Motor function | Can stand independently leaning on the wall with the back for 45"             | Can stand independently leaning on the wall with the back for 1'           | 0  |      | Can stand independently leaning on the wall with the back for 1'           | -1 |      |
|    | Motor function | Can walk 20 steps supported by two wrists                                     | Can walk 30 steps supported by two wrists                                  | 0  |      | Can walk 30 steps supported by two wrists                                  | +2 |      |
|    | Motor function | Can walk 10 steps supported by two hands                                      | Can walk 10 steps supported by two hands                                   | -1 |      | Can walk 10 steps supported by two hands                                   | -1 |      |
|    | Motor function | Can sit on a vestibular plate with crossed legs on a pillow for 20'           | Can sit on a vestibular plate with crossed legs on a pillow for 30'        | 0  |      | Can sit on a vestibular plate with crossed legs on a pillow for 30'        | 0  |      |
|    | Motor function | Can sit on a vestibular plate with crossed legs on two pillows (10cm) for 10' | Can sit on a vestibular plate with crossed legs on a stool (34cm) for 10'  | +1 |      | Can sit on a vestibular plate with crossed legs on a stool (34cm) for 10'  | +1 |      |
| 25 | Motor function | Can climb stairs with strong support given to both wrists                     | Can climb stairs with support given to one wrist                           | 0  | 43.3 | Can climb stairs with support given to one wrist                           | 0  | 43.3 |
|    | Motor function | Can descend stairs with strong support given to both wrists from the front    | Can descend stairs with strong support given to both wrists from the front | -1 |      | Can descend stairs with strong support given to both wrists from the front | -1 |      |
| 26 | Motor function | Can stand for less than 1,5' supported by two wrists                          | Can stand for less than 10' supported by two wrists                        | +2 | 71.9 | Can stand for less than 5' supported by two wrists                         | +1 | 71.9 |
|    | Motor function | Can stand for less than 1' supported by two hands                             | Can stand for less than 1' supported by two sleeves                        | +1 |      | Can stand for less than 1' supported by two sleeves                        | +1 |      |
|    | Motor function | Can walk 10 steps with strong trunk support from behind                       | Can walk 30 steps with strong trunk support from behind                    | +1 |      | Can walk 40 steps with strong trunk support from behind                    | +2 |      |
|    | Motor function | Can walk 5 steps with light trunk support from behind                         | Can walk 5 steps supported by one hand                                     | +2 |      | Can walk 5 steps supported by two hands                                    | +1 |      |
| 27 | Motor function | 95% of steps with internal rotation of the right leg                          | <40% of steps with internal rotation of the right leg                      | +2 | 71.0 | <40% of steps with internal rotation of the right leg                      | +2 | 71.0 |

|    |                |                                                                                                      |                                                                                                      |    |      |                                                                                                      |    |      |
|----|----------------|------------------------------------------------------------------------------------------------------|------------------------------------------------------------------------------------------------------|----|------|------------------------------------------------------------------------------------------------------|----|------|
| 28 | Motor function | Can climb the stairs with strong support given to both arms and elastic bandages to both knees       | Can climb the stairs with light support given to both arms                                           | +1 | 70.0 | Can climb the stairs with strong support given to both arms                                          | 0  | 56.7 |
|    | Motor function | Can descend the stairs with strong support given to both arms and elastic bandages to both knees     | Can descend the stairs with light support given to one arm                                           | +2 |      | Can descend the stairs with light support given to both arms                                         | +1 |      |
| 29 | Motor function | Can climb the stairs with strong support given to both wrists                                        | Can climb the stairs with support to one wrist and one hand maintained on the rail                   | 0  | 63.0 | Can climb the stairs with support to one wrist and one hand maintained on the rail                   | 0  | 58.1 |
|    | Motor function | Can climb a whole floor of stairs in less than 5 minutes with strong support given to both wrists    | Can climb a whole floor of stairs in less than 1 minute with strong support given to both wrists     | +1 |      | Can climb a whole floor of stairs in less than 1 minute with strong support given to both wrists     | +1 |      |
|    | Motor function | Can descend the stairs with strong support given to both wrists                                      | Can descend the stairs with one hand maintained on the rail by the caregiver                         | +1 |      | Can descend the stairs with support to one wrist and one hand maintained on the rail                 | 0  |      |
|    | Motor function | Can descend a whole floor of stairs in more than 5 minutes with strong support given to both wrists  | Can descend a whole floor of stairs in less than 1 minute with strong support given to both wrists   | +2 |      | Can descend a whole floor of stairs in less than 1 minute with strong support given to both wrists   | +2 |      |
|    | Motor function | Can participate in the movement of standing up from the floor with strong support given to the trunk | Can participate in the movement of standing up from the floor with strong support given to one wrist | +1 |      | Can participate in the movement of standing up from the floor with strong support given to one wrist | +1 |      |
| 30 | Motor function | Can walk 20 steps with strong trunk support from behind                                              | Can walk 50 steps with strong trunk support from behind                                              | +1 | 66.8 | Can walk 50 steps with strong trunk support from behind                                              | +1 | 66.8 |
|    | Motor function | Can walk 10 steps with light trunk support from behind                                               | Can walk 10 steps supported by two wrists                                                            | 0  |      | Can walk 10 steps supported by two wrists                                                            | 0  |      |
|    | Motor function | Can stand for 20" leaning on a table in front of her                                                 | Can stand for >1' leaning on a table in front of her                                                 | +2 |      | Can stand for >1' leaning on a table in front of her                                                 | +2 |      |

|    |                  |                                                                                                                |                                                                                           |    |      |                                                                                                                |    |      |
|----|------------------|----------------------------------------------------------------------------------------------------------------|-------------------------------------------------------------------------------------------|----|------|----------------------------------------------------------------------------------------------------------------|----|------|
|    | Motor function   | Can sit on the edge of the table for 25" with strong support given to the thighs                               | Can sit on the edge of the table for >1' with strong support given to the thighs          | +2 |      | Can sit on the edge of the table for >1' with strong support given to the thighs                               | +2 |      |
|    | Motor function   | Can sit on the edge of the table for 15" with light support given to the thighs                                | Can sit on the edge of the table for 15" with light support given to one thigh            | 0  |      | Can sit on the edge of the table for 15" with light support given to one thigh                                 | 0  |      |
|    | Physical fitness | Moderate fear of movement (between 25 and 35 on the fear of movement scale)                                    | Moderate fear of movement (between 15 and 25 on the fear of movement scale)               | 0  |      | Moderate fear of movement (between 15 and 25 on the fear of movement scale)                                    | 0  |      |
| 31 | Motor function   | Can stand for 10" independently                                                                                | Can stand up to 1' independently                                                          | +1 | 65.0 | Can't stand independently                                                                                      | -2 | 30.0 |
|    | Motor function   | Can walk for 5 steps independently                                                                             | Can walk for more than 20 steps independently                                             | +2 |      | Can walk for 2 steps independently                                                                             | -2 |      |
|    | Motor function   | Can climb the stairs with strong support given to both arms                                                    | Can climb the stairs with support given to one hand and the other maintained on the rail  | +1 |      | Can climb the stairs with strong support given to the trunk                                                    | -2 |      |
|    | Motor function   | Can descend the stairs with strong support given to both arms                                                  | Can descend the stairs with strong support given to both wrists                           | 0  |      | Can descend the stairs with strong support given to the trunk                                                  | -2 |      |
| 32 | Motor function   | Can walk up a slope with intermittent support (five steps without the need for support)                        | Can walk up a slope with intermittent support (five steps without the need for support)   | -1 | 46.9 | Can walk up a slope without support, with a safety belt                                                        | 0  | 30.2 |
|    | Motor function   | Can walk down a slope with intermittent support (five steps without the need for support)                      | Can walk down a slope with intermittent support (five steps without the need for support) | -1 |      | Can walk down a slope with intermittent support (five steps without the need for support)                      | -1 |      |
|    | Motor function   | She can sit in the car with light stimulation to her pelvis and need to be helped to lift both legs in the car | She can sit in the car independently but need to be helped to lift both legs in the car   | 0  |      | She can sit in the car with light stimulation to her pelvis and need to be helped to lift both legs in the car | -1 |      |
| 33 | Motor function   | Can walk >10 steps with light trunk support from behind                                                        | Can walk >10 steps supported by two hands                                                 | +1 | 64.9 | Can walk >10 steps supported by two hands                                                                      | +1 | 59.9 |

|    |                 |                                                                                                |                                                                          |    |      |                                                                          |    |      |
|----|-----------------|------------------------------------------------------------------------------------------------|--------------------------------------------------------------------------|----|------|--------------------------------------------------------------------------|----|------|
|    | Motor function  | Can walk 3 rounds of the living room without stopping                                          | Can walk 7 rounds of the living room without stopping                    | +1 |      | Can walk 5 rounds of the living room without stopping                    | 0  |      |
|    | Range of motion | No deterioration in shoulder flexion (actually -20°both sides)                                 | Improvement of at least 10° (both shoulders)                             | +1 |      | Improvement of at least 5° (both shoulders)                              | 0  |      |
|    | Motor function  | Can stand for >1' supported by two hands                                                       | Can stand for >1' supported by two sleeves                               | +2 |      | Can stand for >1' supported by two sleeves                               | +2 |      |
|    | Motor function  | Can stand leaning on the table at her back for less at least 45" independently                 | Can stand leaning on the table at her back for at least 2' independently | 0  |      | Can stand leaning on the table at her back for at least 2' independently | 0  |      |
| 34 | Motor function  | Can walk 20 steps with light trunk support from behind                                         | Can walk 100 steps with light trunk support from behind                  | +2 | 58.7 | Can walk 100 steps with light trunk support from behind                  | +2 | 57.0 |
|    | Motor function  | Can walk 10 steps supported by two wrists                                                      | Can walk 10 steps supported by two hands                                 | 0  |      | Can walk 10 steps supported by one hand                                  | +1 |      |
|    | Motor function  | Can stand for >1' supported by two wrist                                                       | Can stand for >1' held by two sleeves                                    | 0  |      | Can stand for >1' supported by two wrist                                 | -1 |      |
|    | Range of motion | no deterioration (actually -20°)                                                               | no deterioration (actually -20°)                                         | -1 |      | no deterioration (actually -20°)                                         | -1 |      |
| 35 | Range of motion | Right shoulder flexion is limited to 90°                                                       | Improvement of 10°                                                       | +1 | 63.8 | Improvement of 10°                                                       | +1 | 46.5 |
|    | Range of motion | Left shoulder flexion is limited to 80°                                                        | Improvement of 10°                                                       | +1 |      | Improvement of 10°                                                       | +1 |      |
|    | Range of motion | Right shoulder abduction is limited to 94°                                                     | Improvement of 10°                                                       | +1 |      | Right shoulder abduction is limited to 94°                               | -1 |      |
|    | Range of motion | Left shoulder abduction is limited to 86°                                                      | Improvement of 10°                                                       | +1 |      | Improvement of 5°                                                        | 0  |      |
|    | Range of motion | Right hip extension limited to 0°                                                              | Improvement of 10°                                                       | +1 |      | Improvement of 5°                                                        | 0  |      |
|    | Range of motion | Left hip extension limited to 0°                                                               | Left hip ext limited to 0°                                               | -1 |      | Left hip ext limited to 0°                                               | -1 |      |
| 36 | Motor function  | Can climb the stairs with strong support given to both arms and elastic bandages to both knees | Can climb the stairs with strong support given to both arms              | 0  | 55.7 | Can climb the stairs with strong support given to both arms              | 0  | 57.2 |

|    |                  |                                                                                                             |                                                                                                               |    |      |                                                                                                               |    |      |
|----|------------------|-------------------------------------------------------------------------------------------------------------|---------------------------------------------------------------------------------------------------------------|----|------|---------------------------------------------------------------------------------------------------------------|----|------|
| 37 | Motor function   | Can descend the stairs with strong support given to both arms and elastic bandages to both knees            | Can descend the stairs with strong support given to both arms                                                 | 0  | 64.2 | Can descend the stairs with strong support given to both arms and elastic bandages to both knees              | -1 | 48.2 |
|    | Hand functioning | Can eat a piece of food with her hand with complete physical guidance (hand on hand)                        | Can eat a piece of food with her hand with complete physical guidance (hand on hand)                          | -1 |      | Can eat a piece of food with her hand with complete physical guidance (hand on hand)                          | -1 |      |
|    | Hand functioning | Able to maintain the bottle with both hands while drinking with complete physical guidance (hand-on-hand)   | Able to maintain the bottle with both hands while drinking with complete physical guidance (hand-on-hand)     | -1 |      | Able to maintain the bottle with both hands while drinking with complete physical guidance (hand-on-hand)     | -1 |      |
|    | Motor function   | Can walk independently on the lawn for <1 minute without falling                                            | Can walk independently on the lawn for <5 minutes without falling                                             | +1 |      | Can walk independently on the lawn for <10 minutes without falling                                            | +2 |      |
|    | Motor function   | Can stand up from the chair with support given to one hand and a strong motivational factor (cartoon on tv) | Can stand up from the chair independently with a verbal command                                               | +2 |      | Can stand up from the chair independently with a verbal command                                               | +2 |      |
|    | Motor function   | Can stand supported by one hand for more than 1'                                                            | Can stand independently for more than 1'                                                                      | +2 |      | Can stand supported by two sleeves for more than 1'                                                           | 0  |      |
|    | Motor function   | Can assist the movement of standing up from a high chair (half flexed hip, 45°) when pulled from one wrist  | Can stand up independently from a high chair (half flexed hip, 45°) when lightly pulled forward from one hand | 0  |      | Can stand up independently from a high chair (half flexed hip, 45°) when lightly pulled forward from one hand | 0  |      |
|    | Motor function   | Can sit on a chair from standing with slight support given to pelvis and head                               | Can sit on a chair from standing with support given to one wrist                                              | +2 |      | Can sit on a chair from standing with support given to two wrists                                             | +1 |      |
|    | Motor function   | Can walk for 5 steps independently                                                                          | Can walk for 10 steps independently                                                                           | 0  |      | Can walk for 5 steps independently                                                                            | -1 |      |

|    |                  |                                                                                       |                                                                                       |    |      |                                                                                       |    |      |
|----|------------------|---------------------------------------------------------------------------------------|---------------------------------------------------------------------------------------|----|------|---------------------------------------------------------------------------------------|----|------|
| 38 | Motor function   | Required up to 1' to stand by herself after she stands up from a chair                | She can start walking by herself immediately after standing up from a chair           | +2 | 59.5 | She can start walking by herself immediately after standing up from a chair           | +2 | 50.0 |
|    | Physical fitness | After 8' of treadmill walking at 1.5km/h with 10° inclination, the pulse is at 130BPM | After 8' of treadmill walking at 1.5km/h with 10° inclination, the pulse is at 110BPM | +1 |      | After 8' of treadmill walking at 1.5km/h with 10° inclination, the pulse is at 110BPM | +1 |      |
|    | Motor function   | She can walk for 15' of treadmill walking at 1.5km/h with 10° inclination             | She can walk for 30' of treadmill walking at 1.5km/h with 10° inclination             | 0  |      | She can walk for 15' of treadmill walking at 1.5km/h with 10° inclination             | -1 |      |
|    | Motor function   | Can climb the stairs with strong support given to both arms                           | Can climb the stairs with strong support given to both wrists                         | 0  |      | Can climb the stairs with strong support given to both wrists                         | 0  |      |
|    | Motor function   | Can descend the stairs with strong unilateral trunk support given from her side       | Can descend the stairs with strong unilateral trunk support given from her side       | -1 |      | Can descend the stairs with strong unilateral trunk support given from her side       | 0  |      |
|    | Motor function   | Take 5' to cross the room with an obstacle course                                     | Take less than 1' to cross the room with an obstacle course                           | +2 |      | Take 5' to cross the room with an obstacle course                                     | -1 |      |
| 39 | Motor function   | Can stand leaning on the wall for 40 seconds                                          | Can stand leaning on the wall for 2 minutes                                           | +1 | 58.0 | Can stand leaning on the wall for 2 minutes                                           | +1 | 67.6 |
|    | Motor function   | Can sit on an air pillow without support to feet and back for 15 seconds              | Can sit on an air pillow without support to feet and back for 30 seconds              | 0  |      | Can sit on an air pillow without support to feet and back for 30 seconds              | 0  |      |
|    | Motor function   | Can't turn the head to the right only when passively moved                            | Can turn the head to the right when called by the caregiver                           | +1 |      | Can turn the head to the right when called by the caregiver                           | +1 |      |
|    | Range of motion  | Maintains the head turned to the left 90% of the time                                 | Maintains the head turned to the left 80% of the time                                 | 0  |      | Maintains the head turned to the left 50% of the time                                 | +2 |      |
| 40 | Motor function   | Can stand for more than one minute with strong support given to the trunk             | Can stand for more than one minute with strong support given to both wrists           | +1 | 63.2 | Can stand for more than one minute with strong support given to both wrists           | +1 | 55.3 |
|    | Motor function   | Can stand supported by two wrists for less than 1 minute                              | Can stand supported by two wrists for 5 minutes                                       | +1 |      | Can stand supported by two wrists for 2 minutes                                       | 0  |      |
