# Supplementary material for: Individualized Remotely Supervised Motor Activity Programs Promote Rehabilitation Goal Achievement, Motor Functioning, and Physical Activity of People with Rett Syndrome—A Single-Cohort Study
Source: MDPI journal article supplement (doi:10.3390/ijerph20010659), 2022-12-30
Supplement: s1 [file s1]

**Supplementary material 1.** Individual age, MECP2 gene mutation, RARS total and subscales scores at T1, and RESMES total and subscales scores at T1.

| Pz. | Age at baseline | MECP2 gene Mutation                    | RARS T1   |              |           |         |          |                      |       | RESMES T1 |         |          |         |     |        |       |
|-----|-----------------|----------------------------------------|-----------|--------------|-----------|---------|----------|----------------------|-------|-----------|---------|----------|---------|-----|--------|-------|
|     |                 |                                        | Cognition | Sensoriality | Motricity | Emotion | Autonomy | Rett characteristics | Total | Standing  | Sitting | Transfer | Walking | Run | Stairs | Total |
| 1   | 13.3            | R168X                                  | 16        | 4            | 14        | 3       | 12       | 24                   | 73    | 3         | 4       | 20       | 12      | 4   | 7      | 50    |
| 2   | 38.2            | MECP2 mutation not otherwise specified | 19        | 3            | 15.5      | 5.5     | 12       | 27.5                 | 82.5  | 12        | 12      | 26       | 18      | 4   | 8      | 80    |
| 3   | 11.5            | c.916 C>T P.Arg306cys                  | 12.5      | 4            | 13        | 4       | 11.5     | 29.5                 | 74.5  | 4         | 9       | 18       | 14      | 4   | 8      | 57    |
| 4   | 22.0            | P152R                                  | 12.5      | 3            | 9.5       | 2.5     | 9.5      | 24.5                 | 61.5  | 1         | 0       | 16       | 6       | 4   | 6      | 33    |
| 5   | 27.7            | pro225arg                              | 15.5      | 5.5          | 9.5       | 4       | 11       | 22                   | 67.5  | 2         | 0       | 18       | 7       | 4   | 6      | 37    |
| 6   | 13.1            | c.468 C>G                              | 15        | 3            | 13        | 3       | 12       | 25                   | 71    | 6         | 1       | 24       | 17      | 4   | 8      | 60    |
| 7   | 18.1            | del. Exon 3-4                          | 20        | 2            | 9         | 5       | 12       | 23                   | 71    | 0         | 0       | 12       | 6       | 4   | 7      | 29    |
| 8   | 17.2            | c.502 C>T P.Arg168Stop                 | 10.5      | 2            | 5.5       | 2.5     | 10       | 19.5                 | 50    | 0         | 0       | 13       | 2       | 4   | 6      | 25    |
| 9   | 21.4            | del. Exon 3-4                          | 14.5      | 3            | 12        | 4       | 12       | 22.5                 | 68    | 4         | 4       | 23       | 16      | 4   | 8      | 59    |
| 10  | 16.9            | c. 1160_1166 Del cccacc; p.P387fsX406  | 11        | 4.5          | 5.5       | 2       | 6.5      | 23                   | 52.5  | 0         | 0       | 2        | 0       | 2   | 2      | 6     |
| 11  | 5.4             | c.473 C>T p.thr158met                  | 10.5      | 2.5          | 5         | 3       | 11       | 24                   | 56    | 0         | 0       | 2        | 0       | 2   | 6      | 10    |
| 12  | 18.7            | P152R c.455 C>G                        | 21        | 5            | 13        | 4.5     | 12       | 25.5                 | 81    | 4         | 8       | 24       | 17      | 4   | 8      | 65    |
| 13  | 12.8            | c.916 C>T                              | 18.5      | 5            | 10.5      | 5       | 11       | 27                   | 77    | 0         | 0       | 7        | 0       | 4   | 4      | 15    |
| 14  | 12.3            | P.Arg133cys                            | 13.5      | 2.5          | 7         | 3       | 4.5      | 15                   | 45.5  | 0         | 0       | 0        | 0       | 4   | 2      | 6     |
| 15  | 6.5             | c.473 C>T p.thr158met                  | 17.5      | 4            | 9         | 4       | 11.5     | 19                   | 65    | 1         | 0       | 20       | 2       | 4   | 8      | 35    |
| 16  | 13.3            | P133C                                  | 15.5      | 3            | 10.5      | 4       | 10.5     | 29.5                 | 73    | 0         | 0       | 13       | 5       | 4   | 7      | 29    |

|    |      |                                                 |      |     |      |     |      |      |      |    |    |    |    |   |   |    |
|----|------|-------------------------------------------------|------|-----|------|-----|------|------|------|----|----|----|----|---|---|----|
| 17 | 10.3 | c.763 C>T                                       | 15   | 2   | 8.5  | 3   | 12   | 21.5 | 62   | 0  | 0  | 16 | 5  | 4 | 6 | 31 |
| 18 | 31.6 | R255                                            | 10.5 | 3.5 | 12.5 | 3.5 | 12   | 25   | 67   | 11 | 0  | 22 | 18 | 4 | 8 | 63 |
| 19 | 4.2  | c. 808 C>T<br>p. Arg270                         | 19   | 2.5 | 5.5  | 5   | 10   | 21.5 | 64.5 | 0  | 0  | 0  | 0  | 0 | 0 | 0  |
| 20 | 2.8  | del. Exon 4                                     | 23   | 5   | 10.5 | 4.5 | 12   | 27.5 | 82.5 | 3  | 3  | 17 | 11 | 4 | 8 | 46 |
| 21 | 3.7  | p. Arg255                                       | 25   | 4.5 | 7    | 6   | 11   | 26   | 79.5 | 0  | 0  | 7  | 2  | 4 | 7 | 20 |
| 22 | 40.3 | MECP2<br>mutation not<br>otherwise<br>specified | 13.5 | 2   | 8.5  | 3   | 7    | 20.5 | 54.5 | 0  | 0  | 16 | 6  | 4 | 5 | 31 |
| 23 | 16.7 | T158M                                           | 11.5 | 2   | 13   | 3   | 11   | 25.5 | 66   | 11 | 5  | 24 | 18 | 4 | 8 | 70 |
| 24 | 5.3  | c. 316 C>T<br>p. R106W                          | 18.5 | 4   | 8    | 3.5 | 12   | 25.5 | 71.5 | 7  | 0  | 17 | 15 | 4 | 8 | 51 |
| 25 | 14.4 | p. R106W                                        | 13.5 | 4   | 13   | 3   | 11.5 | 21   | 66   | 0  | 0  | 8  | 2  | 4 | 6 | 20 |
| 26 | 12.7 | c. 473 C>T                                      | 10.5 | 3   | 10   | 2.5 | 9    | 19.5 | 54.5 | 6  | 3  | 19 | 15 | 4 | 8 | 55 |
| 27 | 29.2 | del. Exon 3                                     | 18   | 6   | 10   | 7   | 11.5 | 27   | 79.5 | 0  | 0  | 15 | 0  | 4 | 4 | 23 |
| 28 | 13.6 | c. 1063-1326<br>del. 264 +<br>insTGCG           | 11   | 2   | 10.5 | 2   | 12   | 24   | 61.5 | 0  | 0  | 7  | 0  | 4 | 6 | 17 |
| 29 | 5.8  | c. 965 C>T<br>p.Pro322Leu                       | 11.5 | 2   | 6.5  | 2.5 | 12   | 23.5 | 58   | 0  | 0  | 5  | 0  | 4 | 5 | 14 |
| 30 | 9.5  | c. 808 C>T                                      | 17.5 | 2   | 14   | 5.5 | 12   | 28.5 | 79.5 | 9  | 11 | 26 | 15 | 4 | 8 | 73 |
| 31 | 3.8  | c.880 C>T<br>p. Arg294                          | 14   | 5   | 10   | 2.5 | 10   | 27.5 | 69   | 4  | 0  | 10 | 6  | 4 | 8 | 32 |
| 32 | 14.1 | p.Arg306Cys                                     | 19.5 | 3   | 8    | 2.5 | 11.5 | 20   | 64.5 | 0  | 0  | 9  | 2  | 3 | 5 | 20 |
| 33 | 24.6 | T158M                                           | 15.5 | 3   | 10   | 6   | 12   | 21.5 | 68   | 8  | 4  | 22 | 17 | 4 | 8 | 63 |
| 34 | 12.9 | c. 882 C>T<br>p. R294X                          | 16.5 | 3   | 13   | 4   | 12   | 33   | 81.5 | 8  | 1  | 21 | 15 | 4 | 8 | 57 |
| 35 | 38.3 | T158M                                           | 9.5  | 2   | 8.5  | 3   | 9    | 23.5 | 55.5 | 0  | 0  | 7  | 2  | 4 | 3 | 16 |

|    |      |                                                 |      |     |      |     |    |      |      |    |   |    |    |   |   |    |
|----|------|-------------------------------------------------|------|-----|------|-----|----|------|------|----|---|----|----|---|---|----|
| 36 | 5.5  | c.763 C>T<br>p. Arg255                          | 16.5 | 3.5 | 10   | 5.5 | 12 | 31.5 | 73   | 0  | 0 | 9  | 2  | 4 | 8 | 23 |
| 37 | 22.1 | MECP2<br>mutation not<br>otherwise<br>specified | 19.5 | 4   | 10.5 | 4   | 12 | 25.5 | 75.5 | 2  | 2 | 11 | 8  | 4 | 8 | 35 |
| 38 | 13.3 | c. 763 C>T                                      | 16   | 3.5 | 11   | 4   | 12 | 27   | 73.5 | 0  | 0 | 9  | 0  | 4 | 6 | 19 |
| 39 | 14.8 | del. Exon 3-4                                   | 11   | 3.5 | 11.5 | 3.5 | 12 | 22.5 | 64   | 10 | 4 | 25 | 18 | 4 | 8 | 69 |
| 40 | 8.8  | c. 502 C>T<br>p.Arg168X                         | 9    | 2   | 9.5  | 2   | 12 | 17   | 51.5 | 9  | 0 | 19 | 18 | 4 | 8 | 58 |

---

Abbreviation list: Pt. = Participant; RARS = Rett Assessment Rating Scale; RESMES = Rett Syndrome Motor Evaluation Scale.
